# Supplementary material
Source: PubMed Central journal article supplement (PMC2785640)

## Supplementary Data

### Complex lipid requirements for SNARE- and SNARE chaperone-dependent membrane fusion\*

Joji Mima<sup>2</sup> and William Wickner<sup>1</sup>

From Department of Biochemistry, Dartmouth Medical School, 7200 Vail building, Hanover, NH 03755-3844

\*Corresponding author. Department of Biochemistry, Dartmouth Medical School, 7200 Vail Building, Room 425 Remsen, Hanover, NH 03755-3844, USA. Tel.: +1 603 650 1701; Fax: +1 603 650 1353; E-mail: [Bill.Wickner@dartmouth.edu](mailto:Bill.Wickner@dartmouth.edu)

<sup>1</sup>Present address: Institute for Protein Research, Osaka University, Suita, Osaka 565-0871, Japan.

### Supplementary Figure legends

**FIGURE S1. Coomassie-stained gels of reconstituted proteoliposomes (RPLs) bearing yeast vacuolar SNAREs used in this study.** The RPLs were reconstituted with 4SNAREs (*A*), 1R-SNARE (Nyv1p) (*B*), 2Q-SNAREs (Vam3p and Vti1p) (*C*), and 3Q-SNAREs (Vam3p, Vti1p, and Vam7p) (*D*). Donor and acceptor RPLs were used in (*A*, *B*) and (*C*, *D*), respectively. See TABLE 1 for the detailed lipid compositions of the RPLs.

**FIGURE S2. Sec18p and HOPS dependence of vacuolar SNARE RPL lipid mixing.** Vacuolar 4-SNARE RPLs with complete vacuolar lipid composition (Table 1) were used. (A) Sec18p dependence. Lipid mixing was assayed in RB150 with 4-SNARE RPLs (450  $\mu$ M total lipids, 300-750 nM each SNARE), ATP (1mM), MgCl<sub>2</sub> (2 mM), diC8-PI(3)P (90  $\mu$ M), Sec17p (1  $\mu$ M), HOPS (45 nM), and Sec18p (1, 100, 300, or 900 nM). (B) HOPS dependence. Lipid mixing was assayed as in (A) but with Sec18p (900 nM) and HOPS (0, 5, 15, or 45 nM).

**Figure S1**

**A**

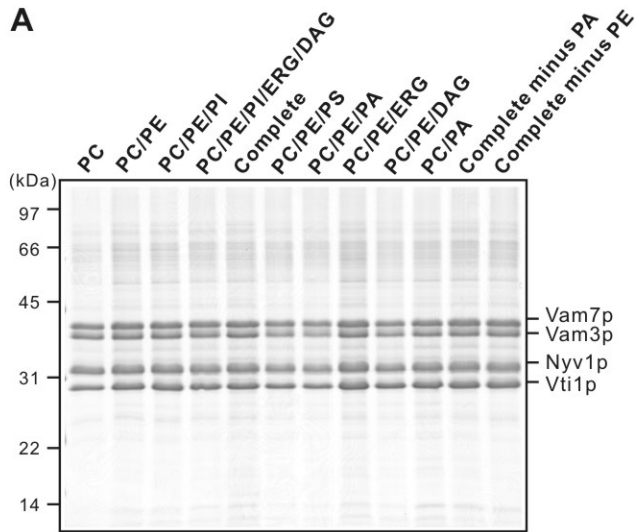

**B**

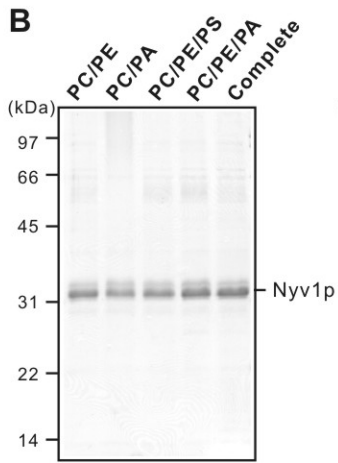

**C**

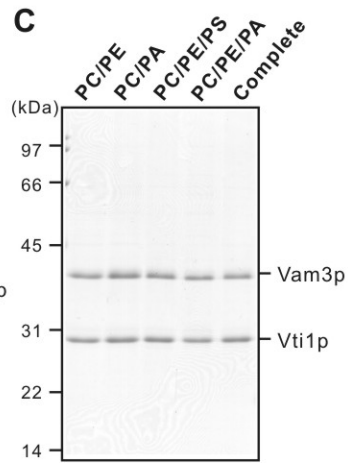

**D**

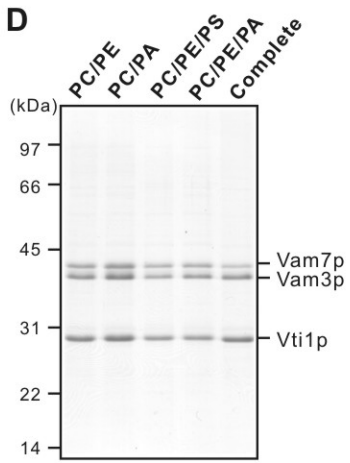

Figure S2

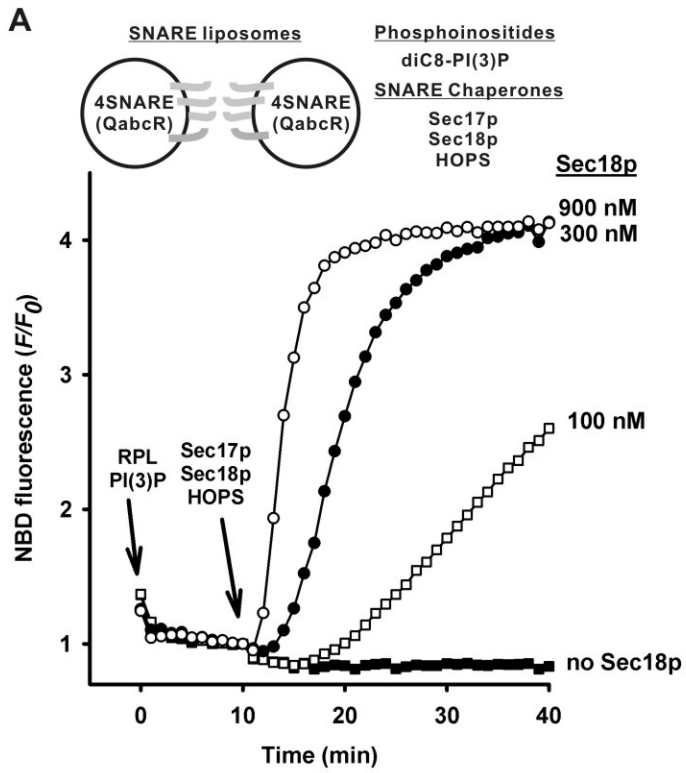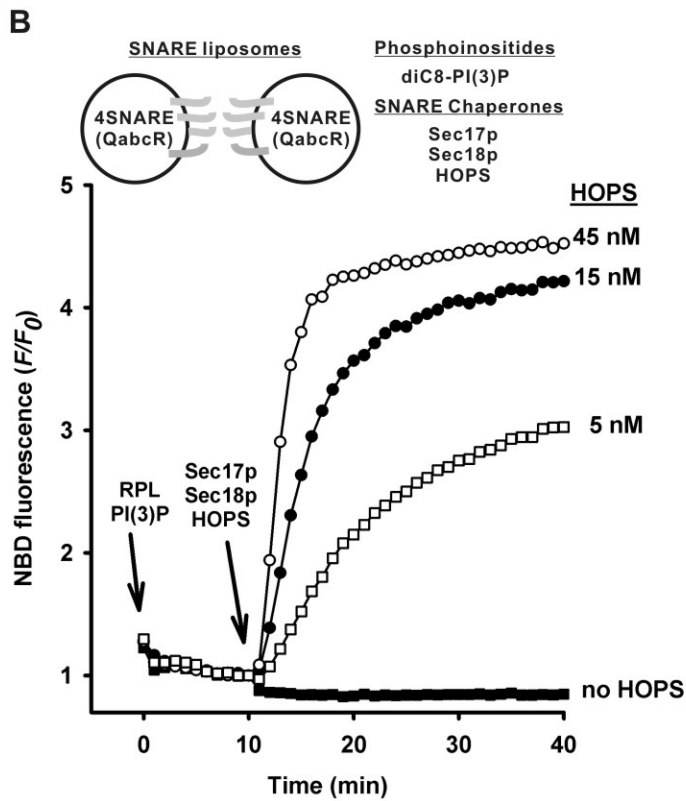

Supplement: supp_M109.010223_jbc.M109.010223-1.pdf [file supp_M109.010223_jbc.M109.010223-1.pdf]
